# Supplementary material for: One ventilator for two patients: feasibility and considerations of a last resort solution in case of equipment shortage
Source: PubMed Central journal article supplement — Thorax. 2020 Apr 23:thoraxjnl-2020-214895. doi: 10.1136/thoraxjnl-2020-214895 (PMC7211107; doi:10.1136/thoraxjnl-2020-214895), 2020-04-23
Supplement: thoraxjnl-2020-214895supp001.pdf [file thoraxjnl-2020-214895supp001.pdf]

## **One ventilator for two patients: feasibility and considerations of a last resort solution in case of equipment shortage**

Tommaso Tonetti<sup>1\*</sup>, Alberto Zanella<sup>2,3\*</sup>, Giacinto Pizzilli<sup>1\*</sup>, Charlene Babcock Irvin<sup>4</sup>, Stefano Nava<sup>5§</sup>, Antonio Pesenti<sup>2,3§</sup> and V. Marco Ranieri<sup>1§</sup>

### **Supplementary material**

#### **Circuit composition:**

- **2 HME filters on the expiratory branch after the T connector.**

Antimicrobial filter for machine protection.

Junctions: 22F - 22M/15F.

Flow resistance at 60 L/min: 3 cmH<sub>2</sub>O

- **2 HME filters (one before each patient).**

Antimicrobial filter for patient humidification and protection.

Junctions: 22F / 15M - 22M/15F.

Flow resistance at 60 L/min: 3 cmH<sub>2</sub>O

- **2 T rigid connector (one for the inspiratory and one for expiratory port of ventilator).**

Junctions: 22M - 22F - 22M

(Alternatively: 2 T connectors 22M - 22M - 22M plus two 22F - 22F adaptors)

- **Respiratory circuit 1,8mt**

Adult circuit for ventilation and anesthesia.

Junctions: 22M/15F on patient's side; 22F on ventilator's side.
